# Supplementary material for: Signaling through Syk or CARD9 Mediates Species-Specific Anti-Candida Protection in Bone Marrow Chimeric Mice
Source: PubMed Central journal article supplement (PMC8406149; doi:10.1128/mbio.01608-21), 2021-08-31
Supplement: mbio.01608-21-st001.pdf [file mbio.01608-21-st001.pdf]

**TABLE S1.** Absolute cytokine concentrations (pg/ml)  $\pm$  SD measured by ELISA from cell culture supernatants of BMDMs treated with *C. parapsilosis* (strains GA1, CLIB214 or CDC317, MOI 5:1, 24 h) or *C. albicans* (strain SC5314, MOI 1:25, 24 h). Data are pooled from a minimum of 4 independent experiments. ctr: control, Cp-: *C. parapsilosis*; Ca-: *C. albicans*.

|                | Wt <sub>Syk</sub>   |                     |                     |                    |                      | Syk <sup>-/-</sup>   |                     |                     |                    |                       |
|----------------|---------------------|---------------------|---------------------|--------------------|----------------------|----------------------|---------------------|---------------------|--------------------|-----------------------|
|                | ctr                 | Cp-GA1              | Cp-CLIB214          | Cp-CDC317          | Ca-SC5314            | ctr                  | Cp-GA1              | Cp-CLIB214          | Cp-CDC317          | Ca-SC5314             |
| TNF $\alpha$   | 5.2 $\pm$ 11.7      | 679.7 $\pm$ 553.7   | 2068.7 $\pm$ 1757.4 | 164.7 $\pm$ 72.5   | 1756.7 $\pm$ 1395.5  | 0 $\pm$ 0            | 370 $\pm$ 235       | 758.3 $\pm$ 537     | 15.4 $\pm$ 12.4    | 23.1 $\pm$ 51.7       |
| KC             | 30.1 $\pm$ 43.6     | 1488.4 $\pm$ 1331.9 | 2414.9 $\pm$ 1841   | 429.7 $\pm$ 245.7  | 1324.4 $\pm$ 553.5   | 35 $\pm$ 61.1        | 2149.1 $\pm$ 2722.4 | 2631.7 $\pm$ 2923   | 394.9 $\pm$ 390    | 103.3 $\pm$ 177.5     |
| MIP-1 $\alpha$ | 32.8 $\pm$ 24.8     | 864.8 $\pm$ 704.9   | 1121.6 $\pm$ 748.2  | 131 $\pm$ 128.4    | 1143.1 $\pm$ 464.8   | 27.7 $\pm$ 17.6      | 810.6 $\pm$ 826.4   | 1091.7 $\pm$ 741.1  | 64.2 $\pm$ 40      | 119 $\pm$ 57.1        |
| MIP-2          | 209 $\pm$ 79.5      | 6840 $\pm$ 2255.7   | 9447.2 $\pm$ 2310.2 | 2301.3 $\pm$ 227.4 | 12787.6 $\pm$ 3967.5 | 162 $\pm$ 96.7       | 7260.7 $\pm$ 4220.8 | 8696.3 $\pm$ 3920.8 | 1742.6 $\pm$ 846.8 | 1021.362 $\pm$ 1428.8 |
|                | WT <sub>CARD9</sub> |                     |                     |                    |                      | CARD9 <sup>-/-</sup> |                     |                     |                    |                       |
|                | ctr                 | Cp-GA1              | Cp-CLIB214          | Cp-CDC317          | Ca-SC5314            | ctr                  | Cp-GA1              | Cp-CLIB214          | Cp-CDC317          | Ca-SC5314             |
| TNF $\alpha$   | 92.7 $\pm$ 160.5    | 217.8 $\pm$ 178.2   | 656.5 $\pm$ 501.4   | 285.2 $\pm$ 317    | 207.3 $\pm$ 192.3    | 66.6 $\pm$ 108       | 105.8 $\pm$ 186.2   | 379.6 $\pm$ 288.1   | 137 $\pm$ 174.1    | 93.7 $\pm$ 166.6      |
| KC             | 1.8 $\pm$ 4.4       | 685.6 $\pm$ 555.5   | 1531.7 $\pm$ 916.1  | 334.8 $\pm$ 287    | 322.8 $\pm$ 214.3    | 7.6 $\pm$ 18.6       | 206.4 $\pm$ 239.9   | 931.9 $\pm$ 606.7   | 224.5 $\pm$ 249.9  | 0.8 $\pm$ 2.2         |
| MIP-1 $\alpha$ | 60.7 $\pm$ 70.9     | 674.8 $\pm$ 668.8   | 1126 $\pm$ 626.7    | 279.8 $\pm$ 330.9  | 478 $\pm$ 342.1      | 33.5 $\pm$ 47.9      | 275.9 $\pm$ 362.3   | 716.6 $\pm$ 529.2   | 115.8 $\pm$ 132.1  | 147.4 $\pm$ 217.4     |
| MIP-2          | 0 $\pm$ 0           | 1835.4 $\pm$ 562.5  | 4125.7 $\pm$ 911    | 1518.6 $\pm$ 750.7 | 3037.2 $\pm$ 737     | 46.7 $\pm$ 57.8      | 766.7 $\pm$ 197.2   | 2358.8 $\pm$ 649.6  | 845.6 $\pm$ 529.7  | 115 $\pm$ 85.4        |
